# Supplementary material for: Validation and Diagnostic Accuracy Evaluation of the EQ-5D-5L Shona Digital Version for Screening Anxiety and Depression
Source: Research Square preprint supplement (doi:10.21203/rs.3.rs-7545144/v1), 2025-10-17
Supplement: Supplementary file 1 [file 61246e1e566579db48b0ff08.docx]

# Additional Files

## Additional File 1: EQ-5D-5L against clinician diagnosis and GAD-7 performance in anxiety screening ROC curves

| *S1a Figure: EQ-5D vs GAD-7 diagnostic performance against clinician diagnosis for anxiety screening ROC curves* | *S 1b Fig: SCID anxiety diagnosis and EQ-5D quantiles* | *S1c Fig: GAD-7 and EQ-5D quantiles* |
| --- | --- | --- |

## Additional File 2: EQ-5D-5L against clinician diagnosis and PHQ-9 performance in depression screening ROC curves

| 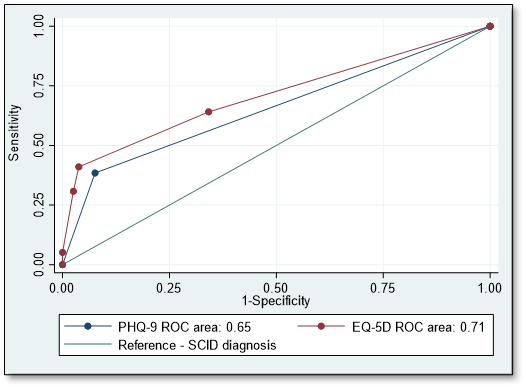  *S2a Figure: EQ-5D vs GAD-7 diagnostic performance against clinician diagnosis for depression screening ROC curves* | *S 2b Fig: SCID depression diagnosis and EQ-5D quantiles* | *S2c Fig: PHQ-9 and EQ-5D quantiles* |
| --- | --- | --- |

## Additional File 3: EQ-5D-5L against clinician diagnosis and SSQ-14 performance in comorbid anxiety/depression screening ROC curves

| *S3a Figure: EQ-5D vs SSQ-14 diagnostic performance against clinician diagnosis for comorbid anxiety/depression ROC curves* | *S3b Figure: SCID comorbid anxiety/depression diagnosis & EQ-5D quantiles* | *S3c Figure: SSQ-14 & EQ-5D quantiles* |
| --- | --- | --- |
